# Supplementary material for: Photovoltaic devices with a PEDOT:PSS:WOx hole transport layer
Source: Royal Society of Chemistry journal article supplement (doi:10.1039/c4ra01580k), 2014-01-01
Supplement: c4ra01580k1.pdf [file c4ra01580k1.pdf]

### Supporting Information

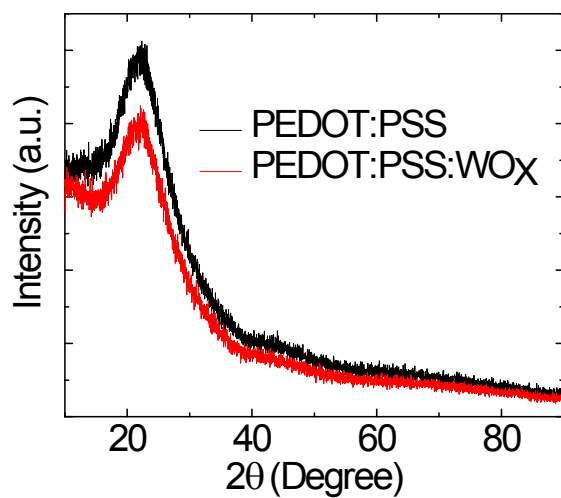

Fig. S1. XRD patterns of PEDOT:PSS and PEDOT:PSS:WO<sub>x</sub> layers.

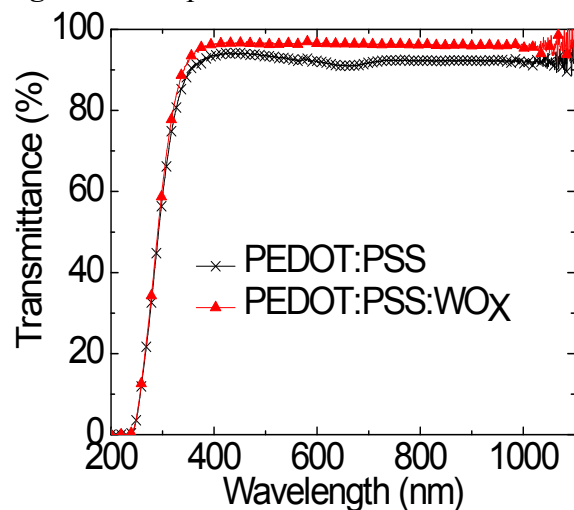

Fig. S2. Transmission of the investigated hole extraction layers.

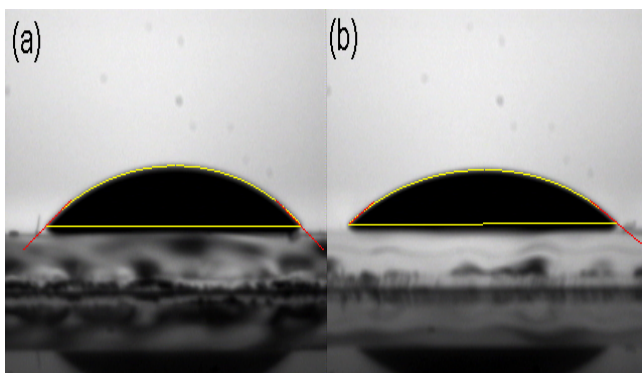

Fig. S3. The water contact angle for (a) PEDOT:PSS and (b) PEDOT:PSS:WO<sub>x</sub> layer with 29° and 36°, respectively.

**Table S1.** Reproducibility of inverted OPVs with different HTLs.

| HTL               | Total devices | The best PCE (%) | Average PCE (%) |
|-------------------|---------------|------------------|-----------------|
| P:WO <sub>x</sub> | 40            | 5.44             | 5.37            |
| P                 | 4             | 4.02             | 3.93            |
